# Supplementary material
Source: PubMed Central journal article supplement (PMC4765366)
Supplement: NIHMS760587-supplement-Miller_Supplemental_Data.pdf [file NIHMS760587-supplement-Miller_Supplemental_Data.pdf]

## SUPPLEMENTARY MATERIAL

### Inhaled Ozone (O<sub>3</sub>)-Induces Changes in Serum Metabolomic and Liver Transcriptomic Profiles in Rats

Desinia B. Miller<sup>1</sup>, Edward D. Karoly<sup>2</sup>, Jan C. Jones<sup>2</sup>, William O. Ward<sup>3</sup>, Beena D. Vallanat<sup>3</sup>, Debora L. Andrews<sup>3</sup>, Mette C. Schladweiler<sup>4</sup>, Samantha J. Snow<sup>4</sup>, Virginia L. Bass<sup>5</sup>, Judy E. Richards<sup>4</sup>, Andrew J. Ghio<sup>4</sup>, Wayne E. Cascio<sup>4</sup>, Allen D. Ledbetter<sup>4</sup>, and Urmila P. Kodavanti<sup>4</sup>

<sup>1</sup> Curriculum in Toxicology, University of North Carolina-Chapel Hill, Chapel Hill, North Carolina, United States of America, <sup>2</sup>Metabolon Incorporation, Durham, North Carolina, United States of America, <sup>3</sup>Research Cores Unit and, <sup>4</sup>Environmental Public Health Division, National Health and Environmental Effects Research Laboratory, U.S. Environmental Protection Agency, Research Triangle Park, North Carolina, United States of America, <sup>5</sup> Department of Environmental Sciences and Engineering, Gillings School of Global Public Health, University of North Carolina, Chapel Hill, NC, United states of America

#### **Address correspondence:**

Urmila P Kodavanti, PhD  
MD B105-04, NHEERL, U.S. EPA  
Research Triangle Park, NC 27711  
[kodavanti.urmila@epa.gov](mailto:kodavanti.urmila@epa.gov)  
Phone: 919 541-4963; Fax: 919-541-0026

**Disclaimer:** The research described in this article has been reviewed by the National Health and Environmental Effects Research Laboratory, U.S. Environmental Protection Agency, and approved for publication. Approval does not signify that the contents necessarily reflect the views and policies of the Agency, nor does the mention of trade names of commercial products constitute endorsement or recommendation for use.

**SI Figure 1:** Heatmaps of liver gene expression for cytokine network in rats exposed to O<sub>3</sub> (A: immediately after 1-day 6-hr air or O<sub>3</sub>, 0-hr time point; B. immediately after 2-day 6-hr air or O<sub>3</sub>, 2-day, 0-hr) and C. 18-hr after 2-day 6-hr air or O<sub>3</sub>; 2-day, 18-hr) exposure.

Figure 1A

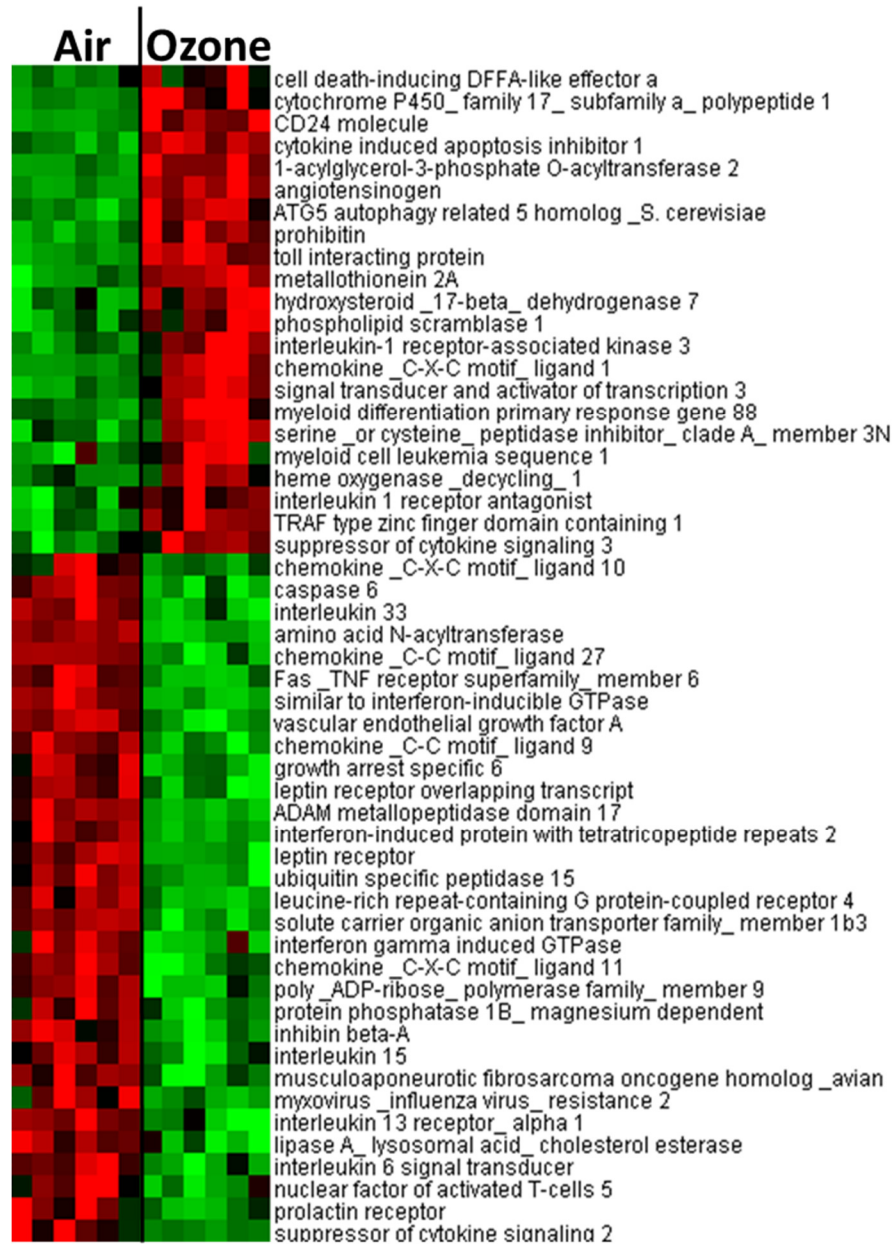

Figure 1B

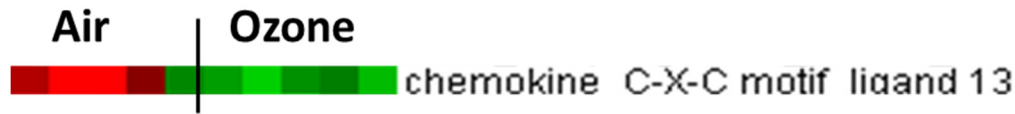

Figure 1C

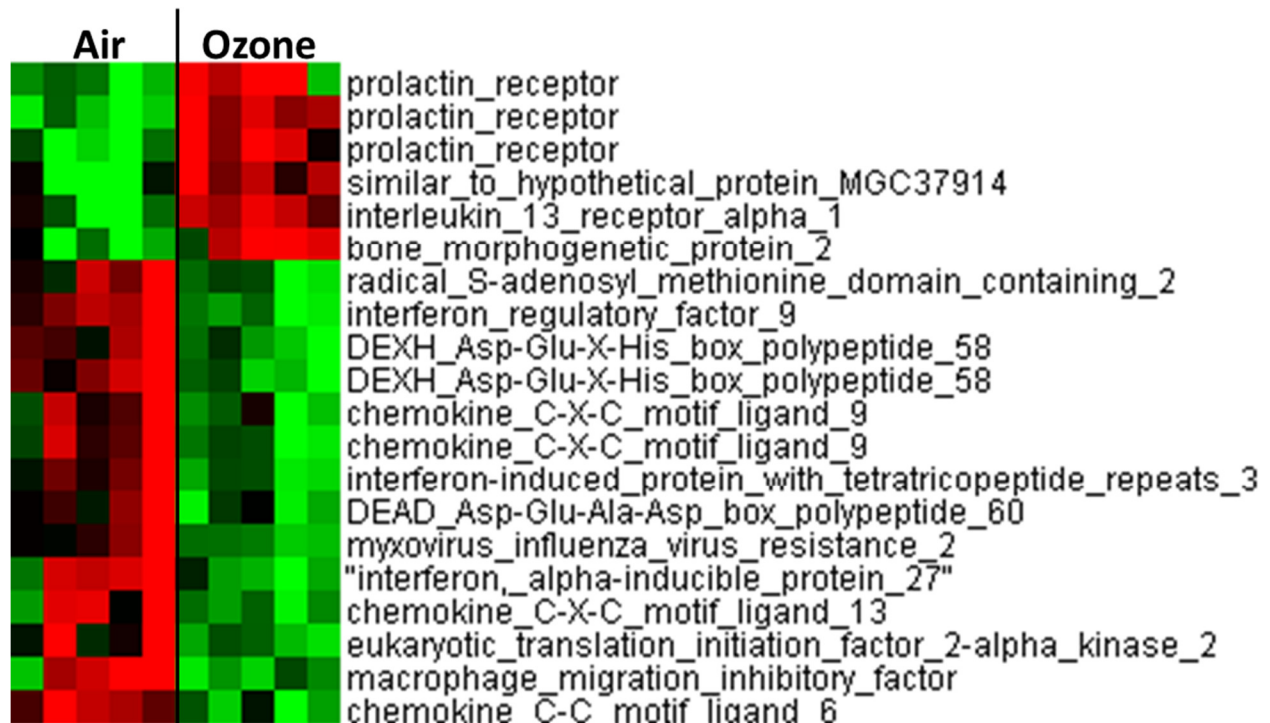

Functional gene lists were generated by NetAffx queries at the Affymetrix website ([www.affymetrix.com](http://www.affymetrix.com)) and identified from differentially expressed genes (DEGs) list for each time point (air vs O<sub>3</sub>) based on the query term, "cytokines". Genes were then median centered with average linkage, hierarchically clustered using Cluster 3.0 and displayed through Java Treeview. Heat map of DEGs with significant O<sub>3</sub> effect were identified separately at each time point. Red indicates genes that have high expression values across both groups, green indicates genes that have low expression values across both groups, and black indicates median expression.

**SI Figure 2:** Heatmaps of liver gene expression showing differentially expressed genes (air versus O<sub>3</sub>) for apoptosis network in rats exposed to O<sub>3</sub> (A-D, exposed for 6hr/day; immediately after 1-day; E, immediately after 2-day, F, 18-hr after 2-day time point).

Figure 2A

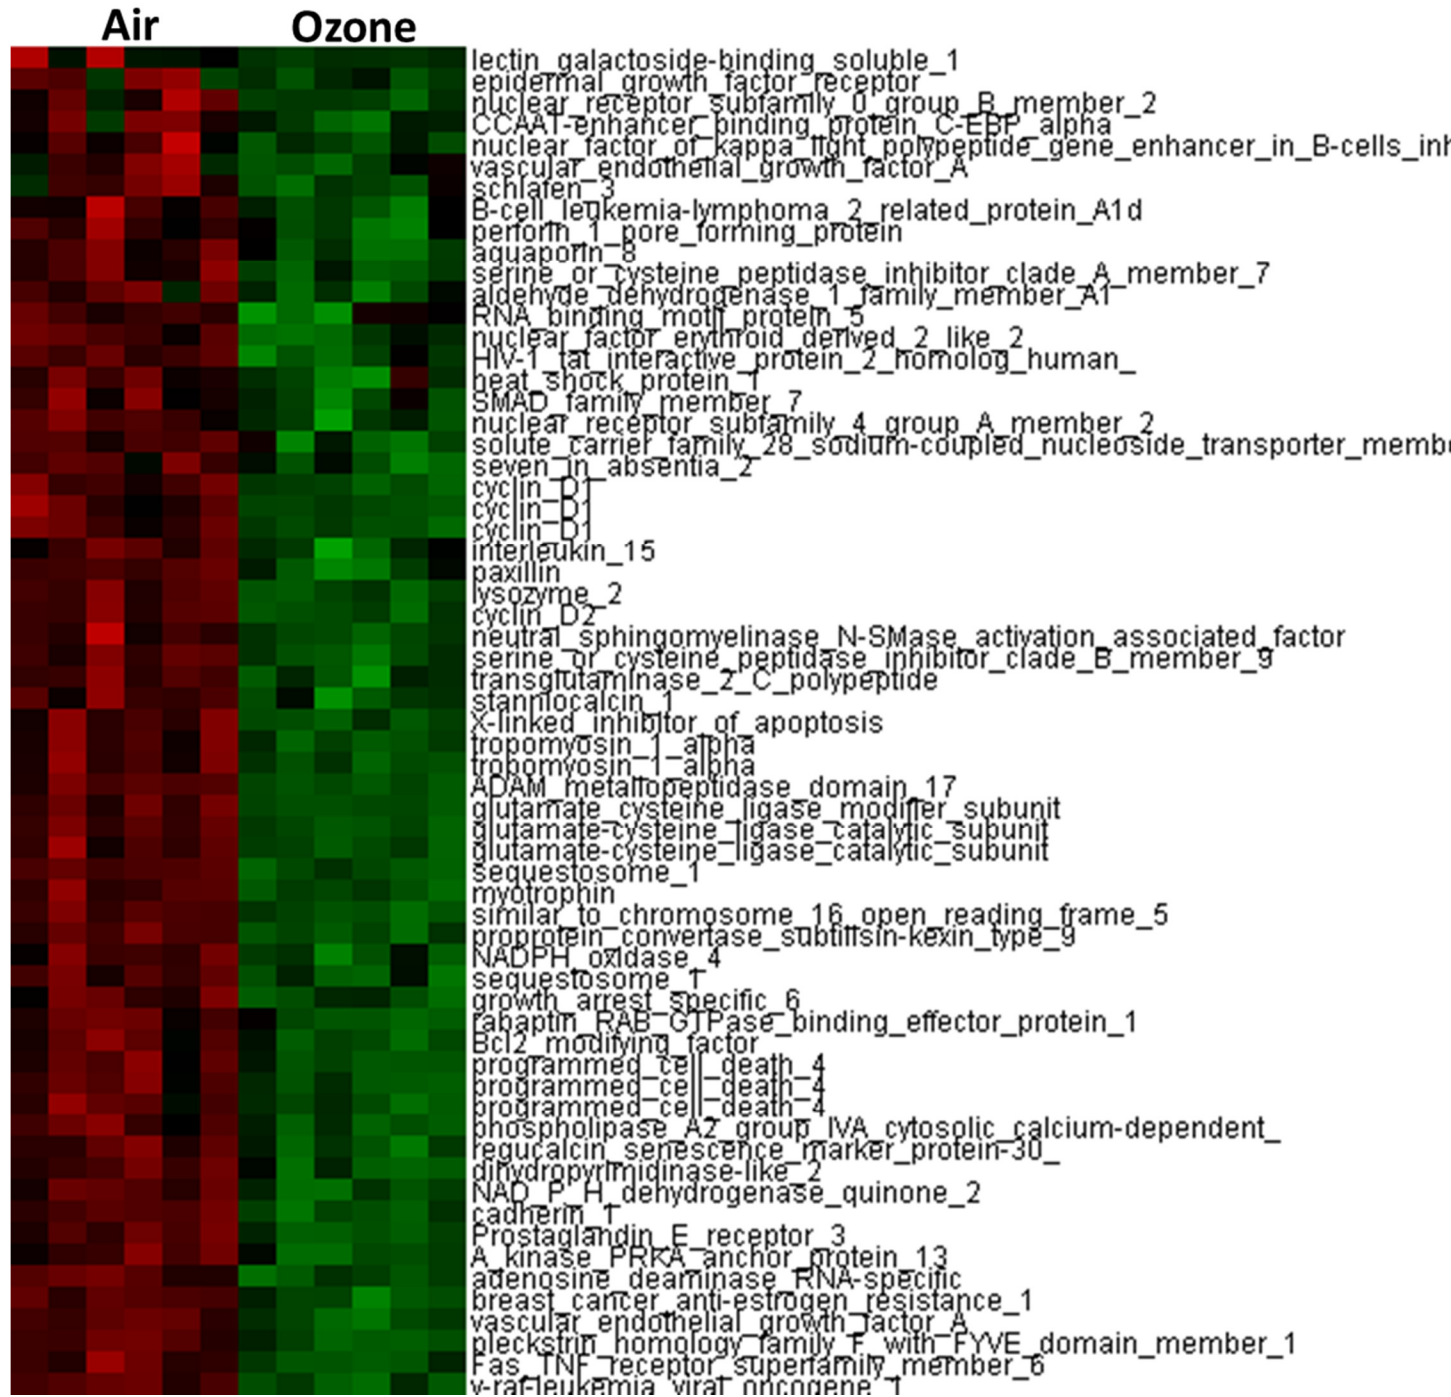

Figure 2B

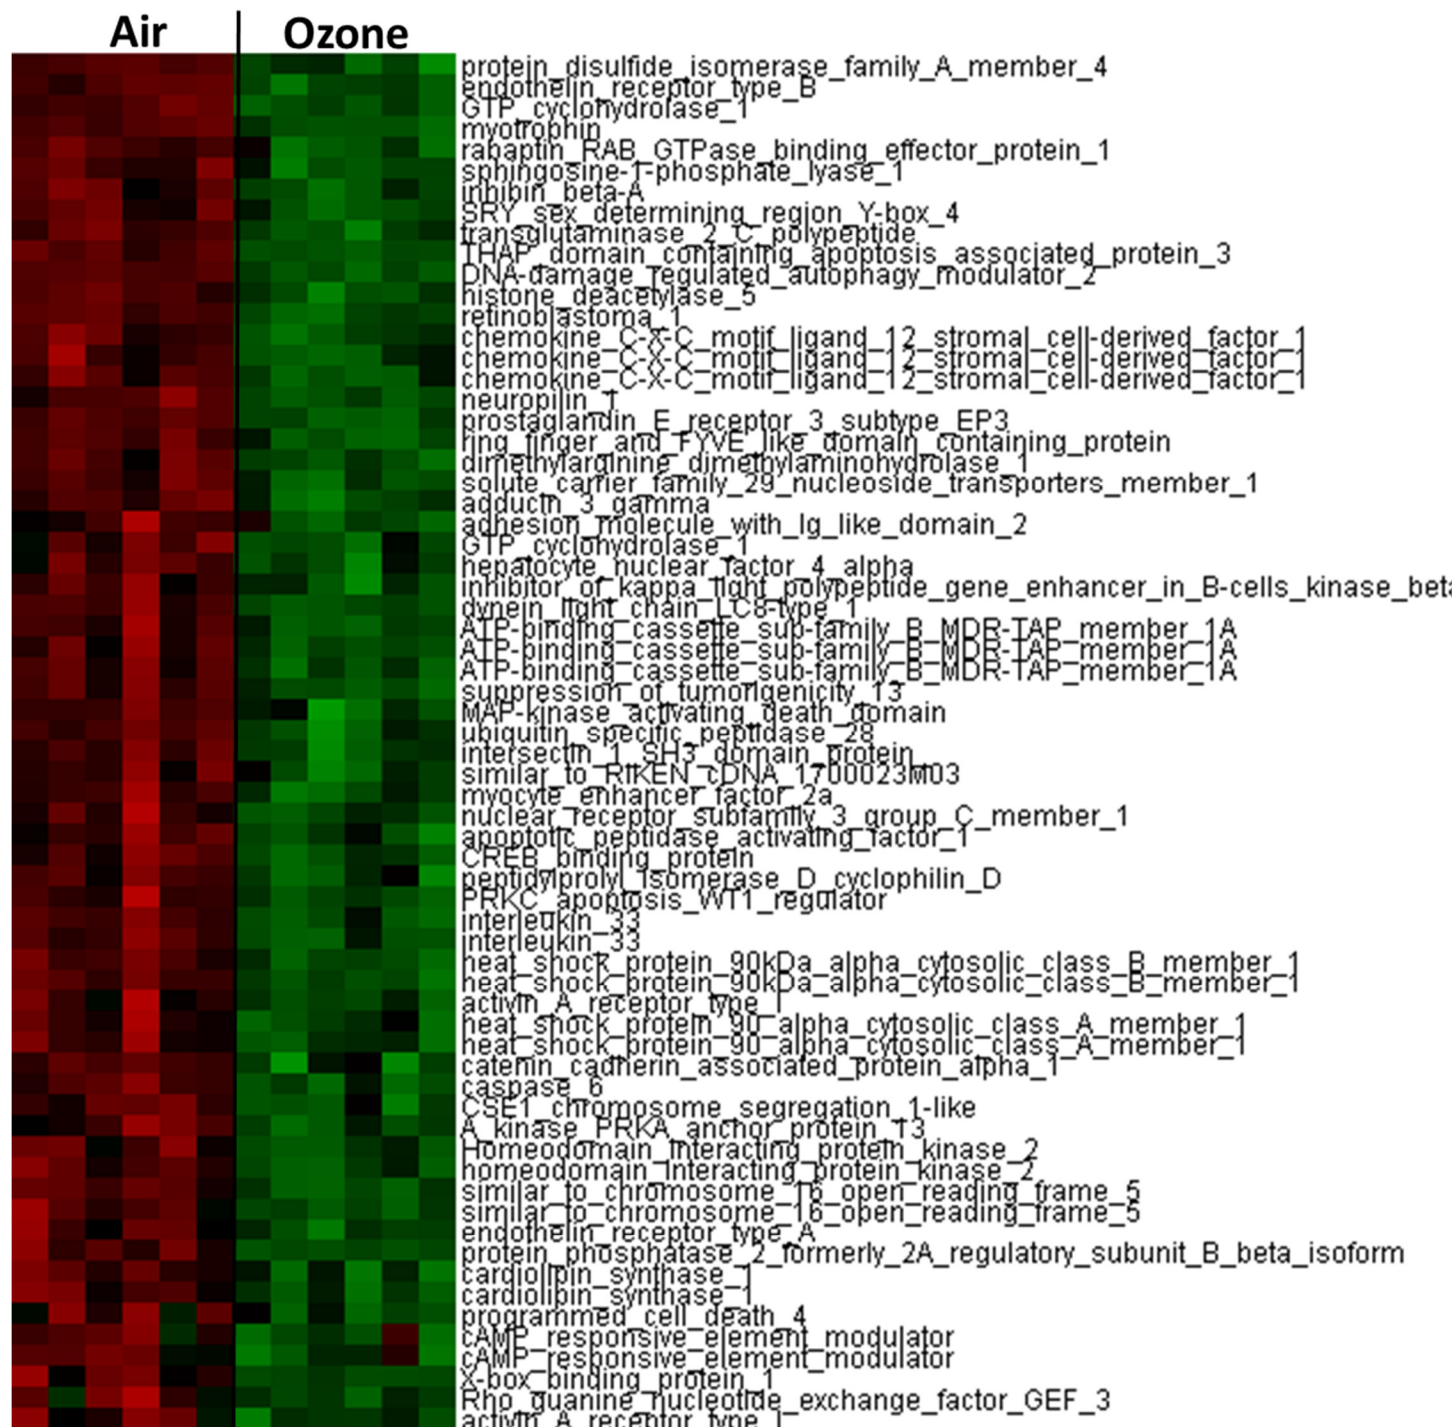

Figure 2C

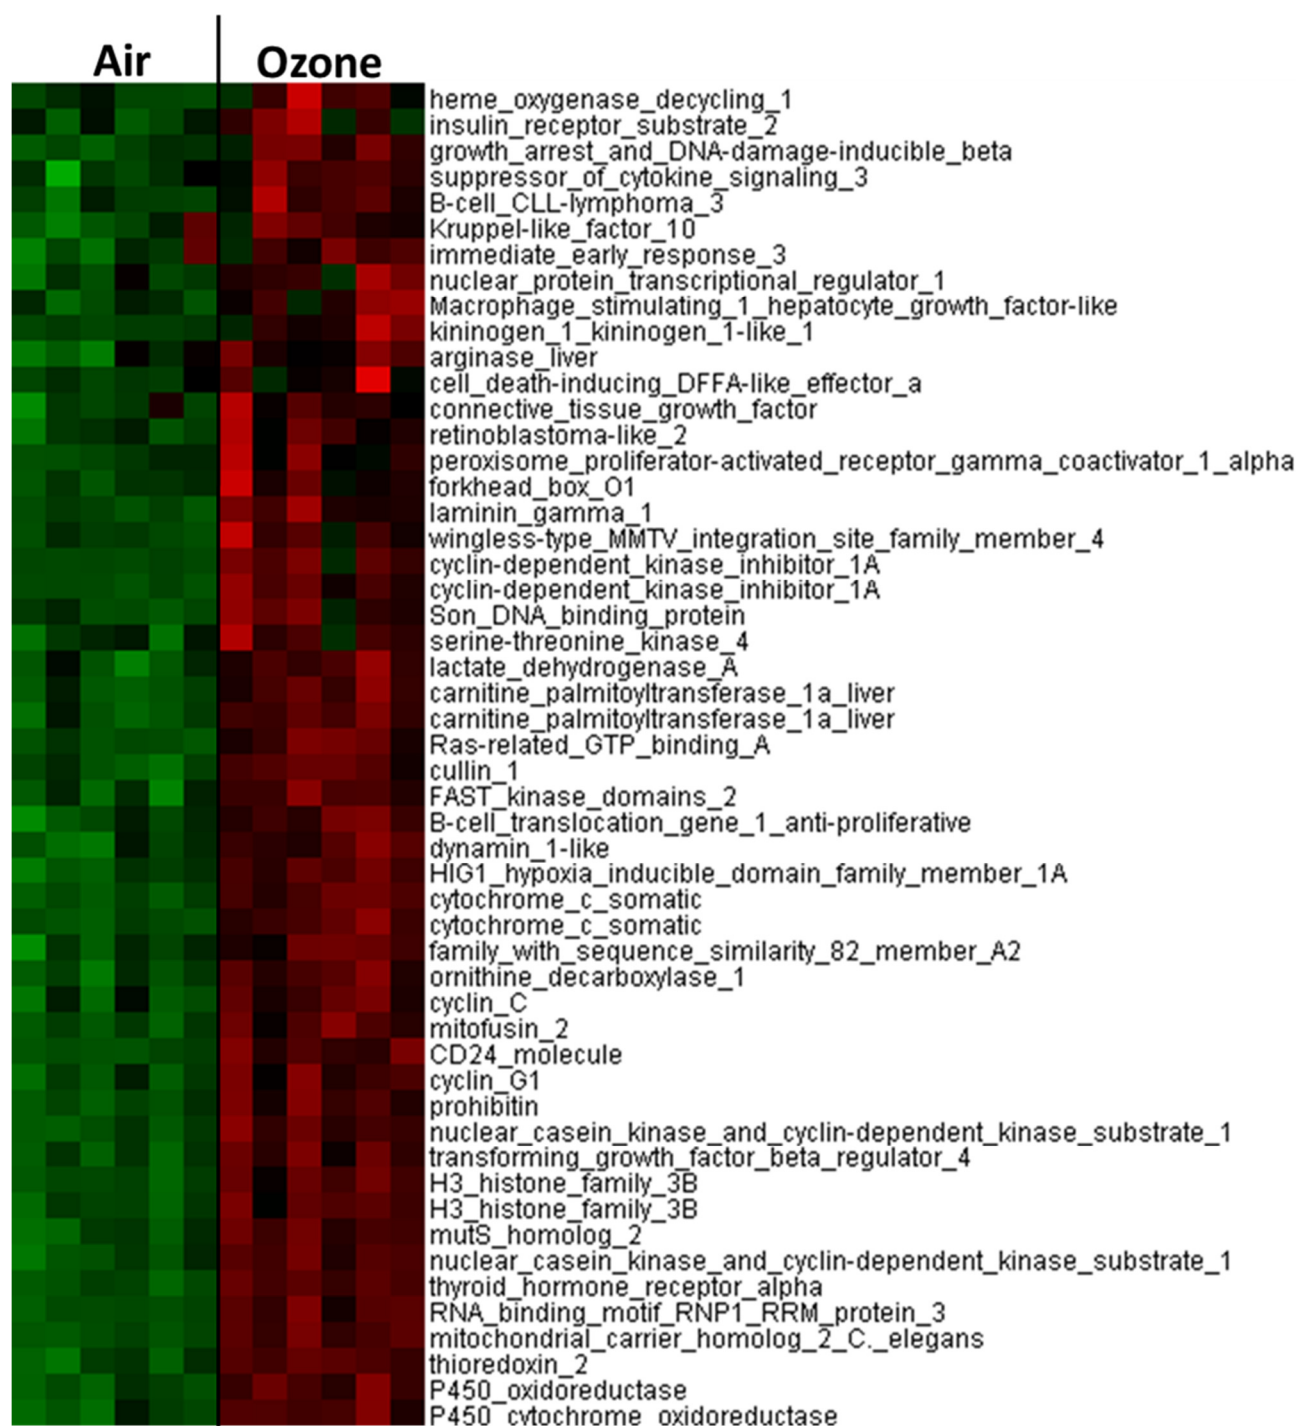

Figure 2D

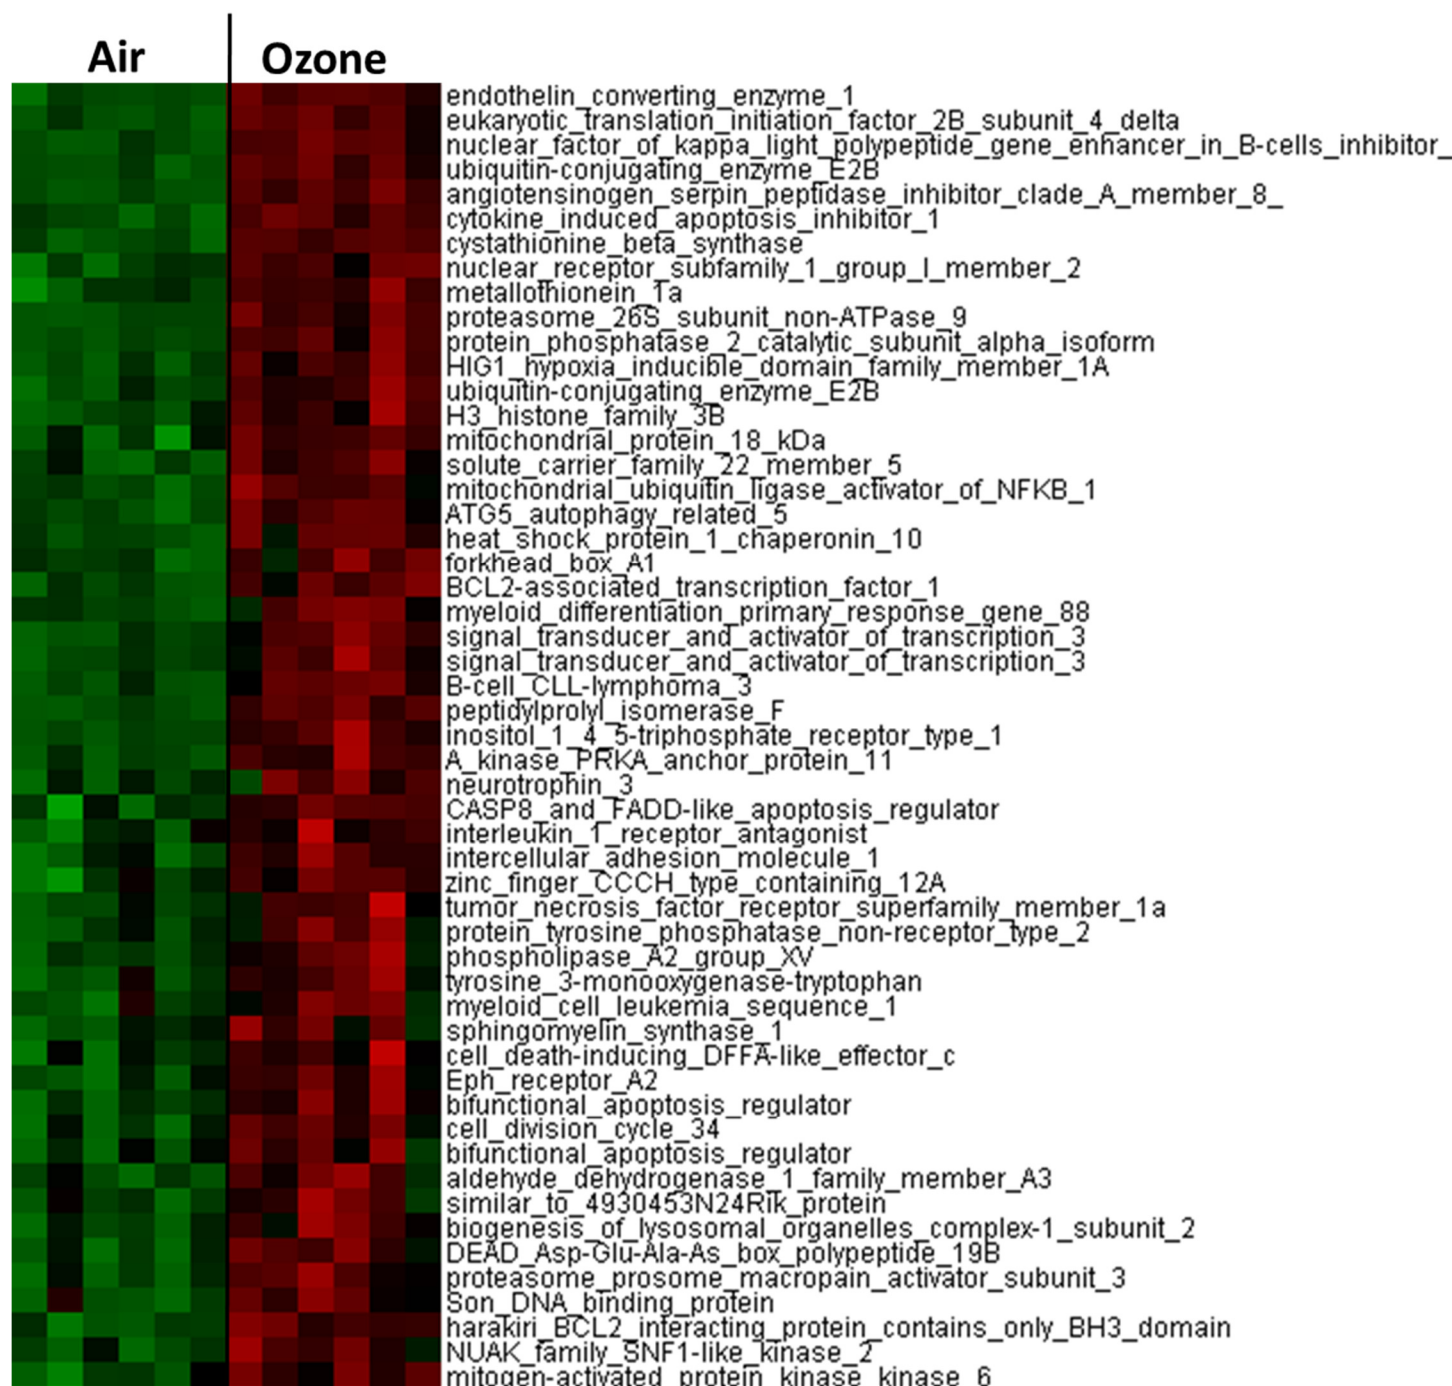

Figure 2E

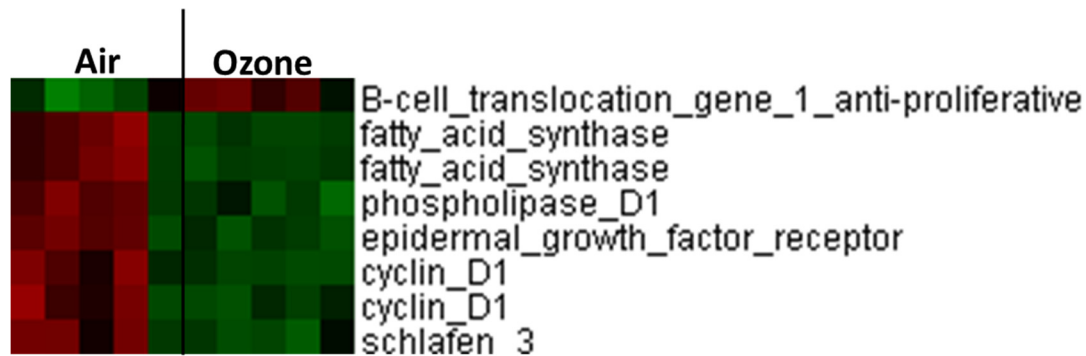

Figure 2F

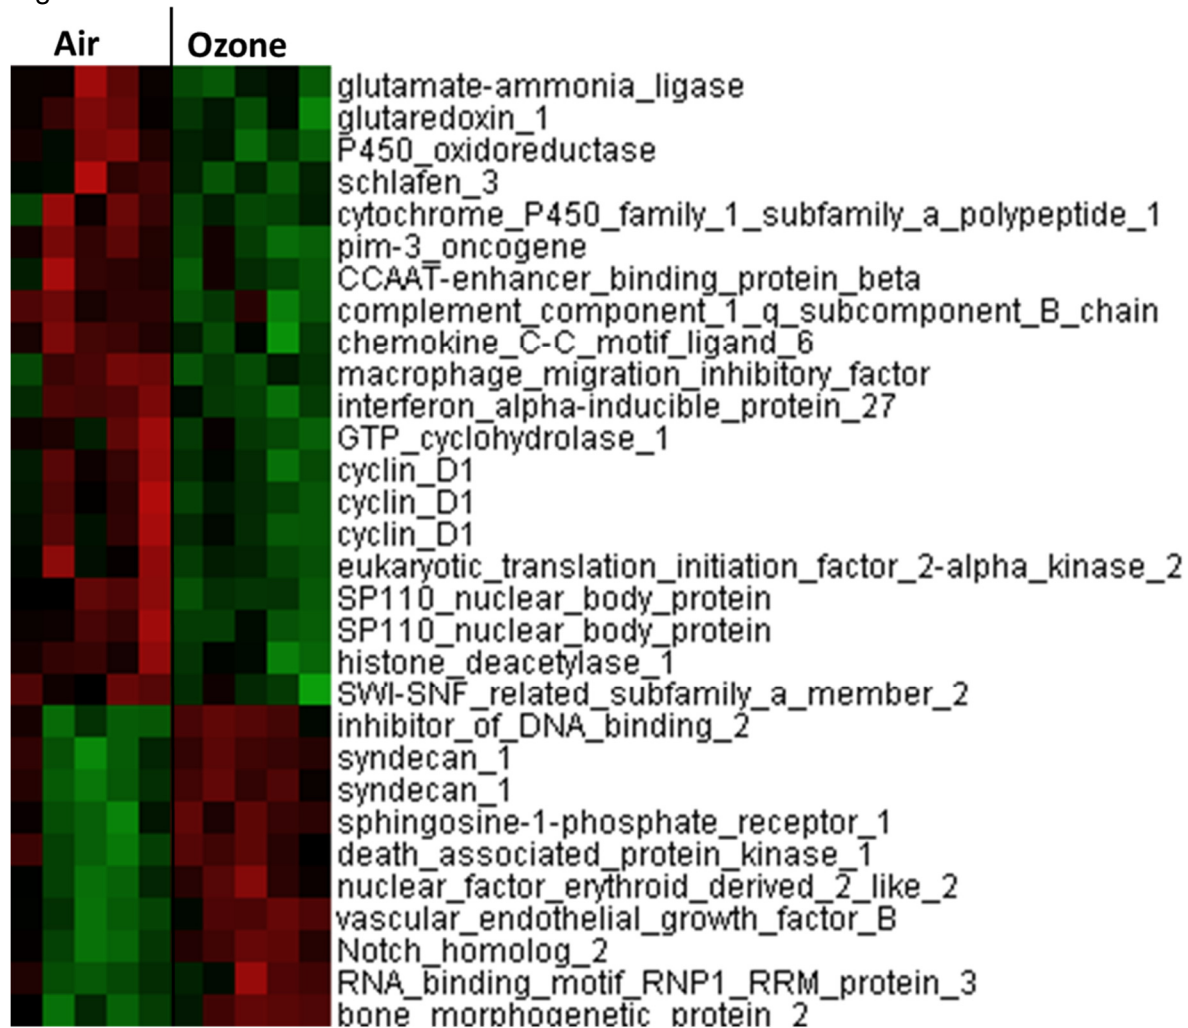

Functional gene lists were generated by NetAffx queries at the Affymetrix website ([www.affymetrix.com](http://www.affymetrix.com)) and identified from differentially expressed genes (DEGs) list based on the query term, "apoptosis". Genes were then median centered with average linkage, hierarchically clustered using Cluster 3.0 and displayed through Java Treeview. Heat map of DEGs with significant O<sub>3</sub> effect were identified separately at each time point. Red indicates genes that have high expression values across both groups, green indicates genes that have low expression values across both groups, and black indicates median expression.



**SI Figure 3:** Heatmap of liver gene expression showing differentially expressed genes (air versus O<sub>3</sub>) for Steroid, insulin and fatty acid receptor signaling network in rats exposed to O<sub>3</sub> for 6hr/day for 1-day (immediately after exposure).

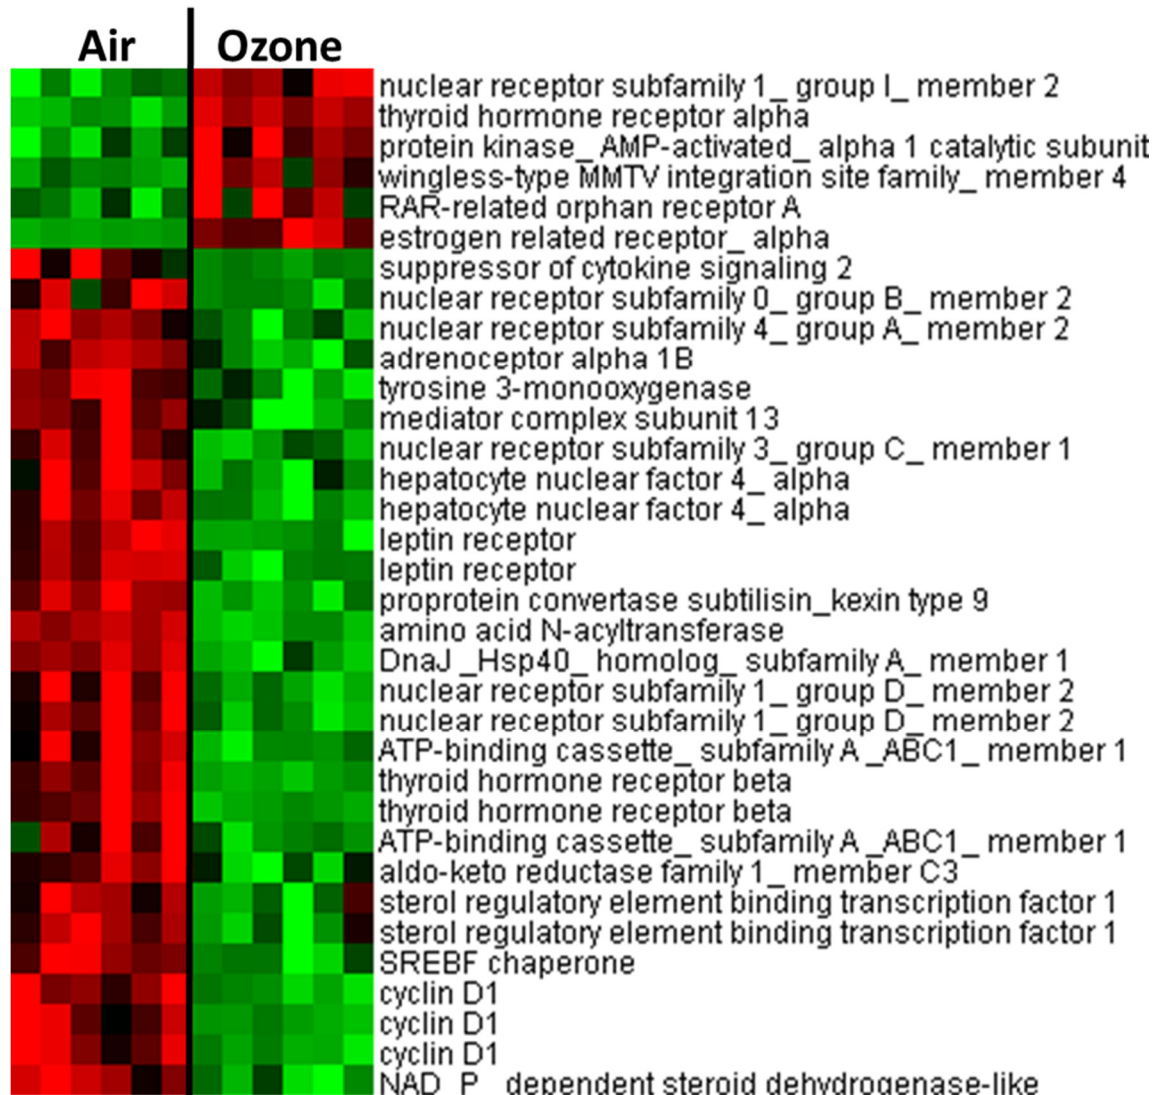

Functional gene lists were generated by NetAffx queries at the Affymetrix website ([www.affymetrix.com](http://www.affymetrix.com)) and identified from differentially expressed genes (DEGs) list based on the query term, "steroid, insulin and fatty acid signaling". Genes were then median centered with average linkage, the normalized expression values for those probesets present on both lists were converted to z values and hierarchically clustered using Cluster 3.0 with average linkage and displayed with Treeview. Red indicates genes that have high expression values across both groups, green indicates genes that have low expression values across both groups, and black indicates median expression.

**SI Figure 4.** Ingenuity pathway analysis showing ozone exposure-induced changes in liver steroid receptor (A), insulin receptor (B) and fatty acid signaling (C).

Figure 4A

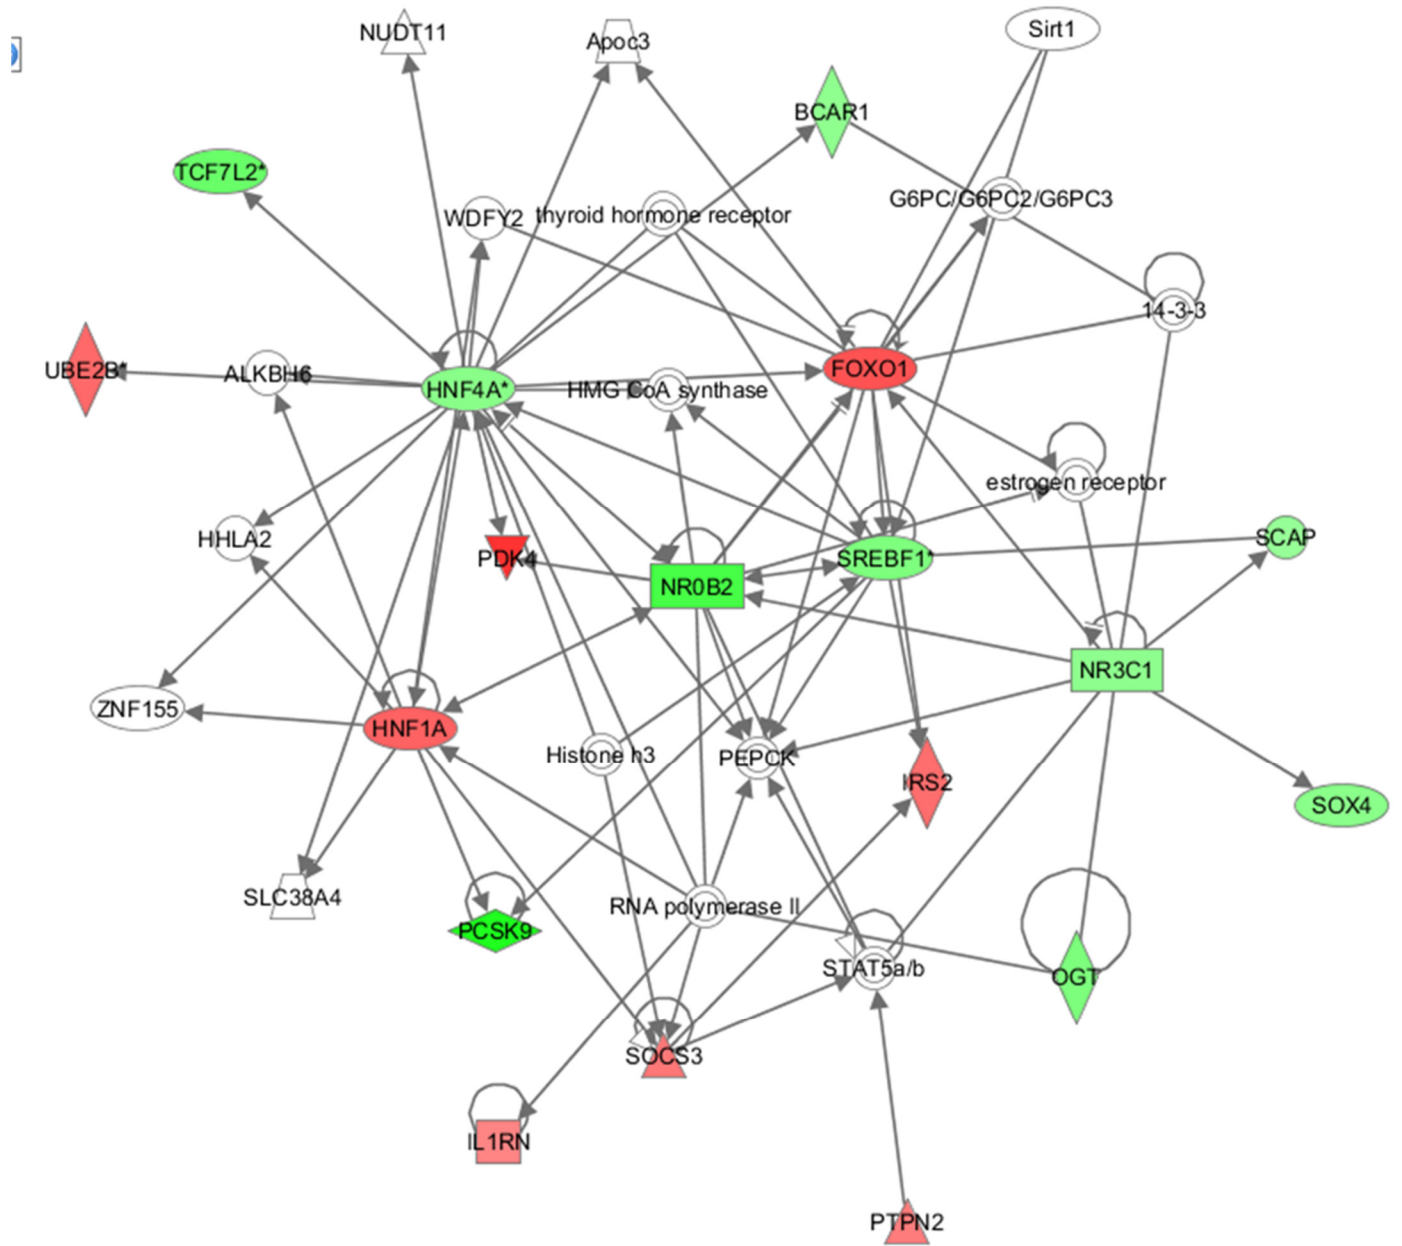

Figure 4B

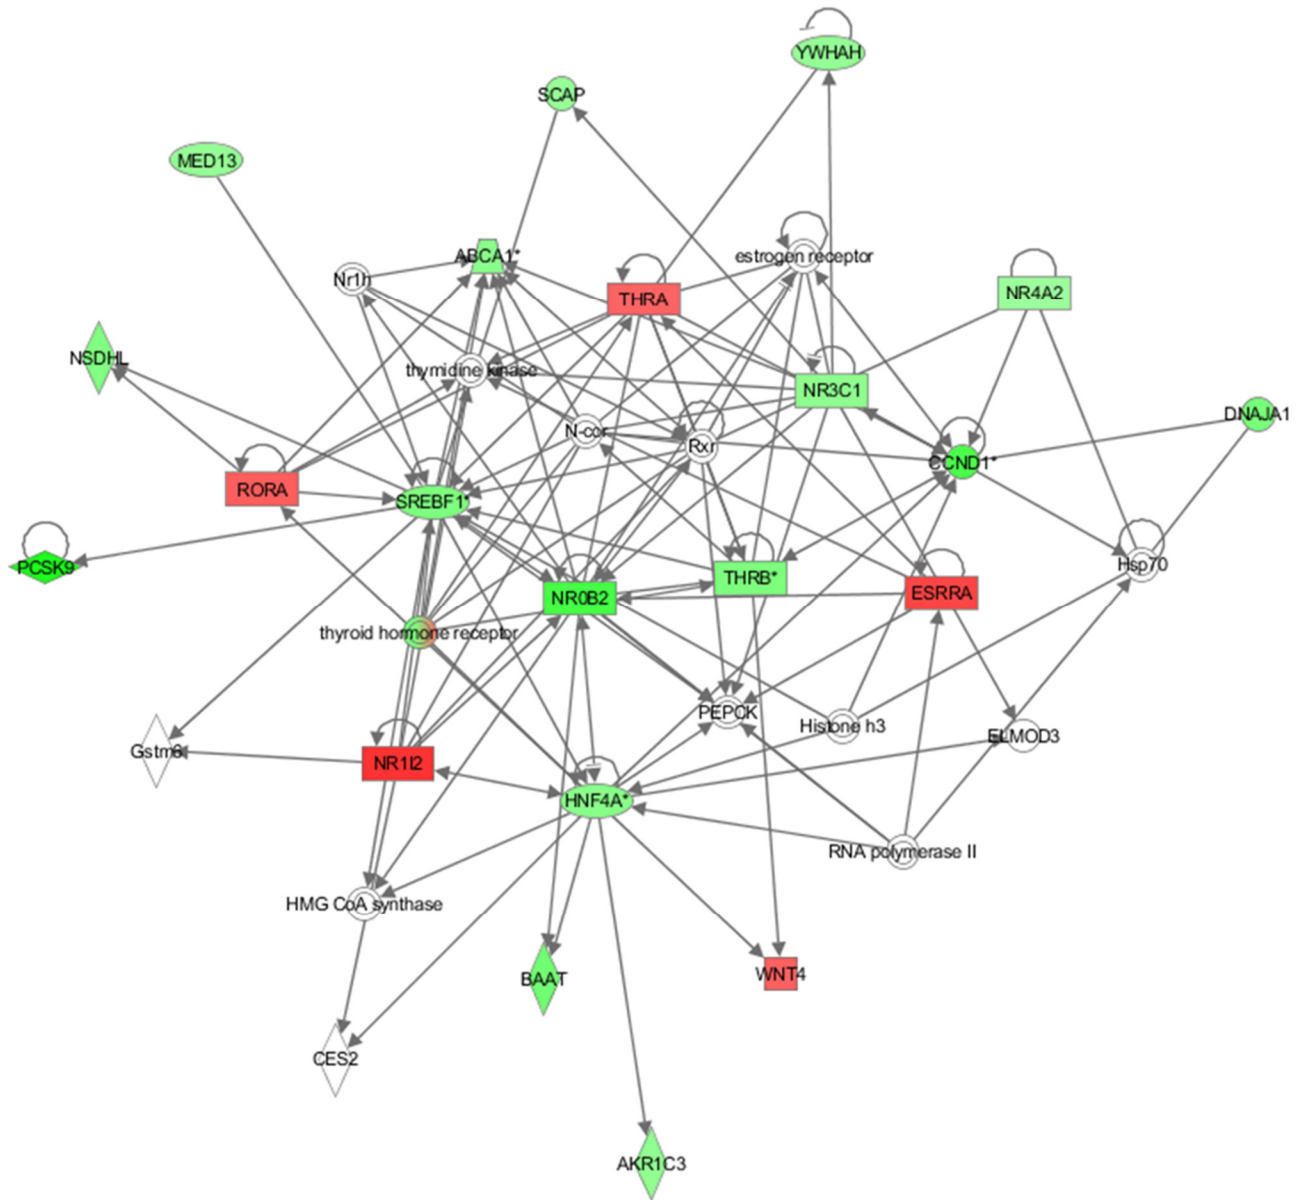

Figure 4C

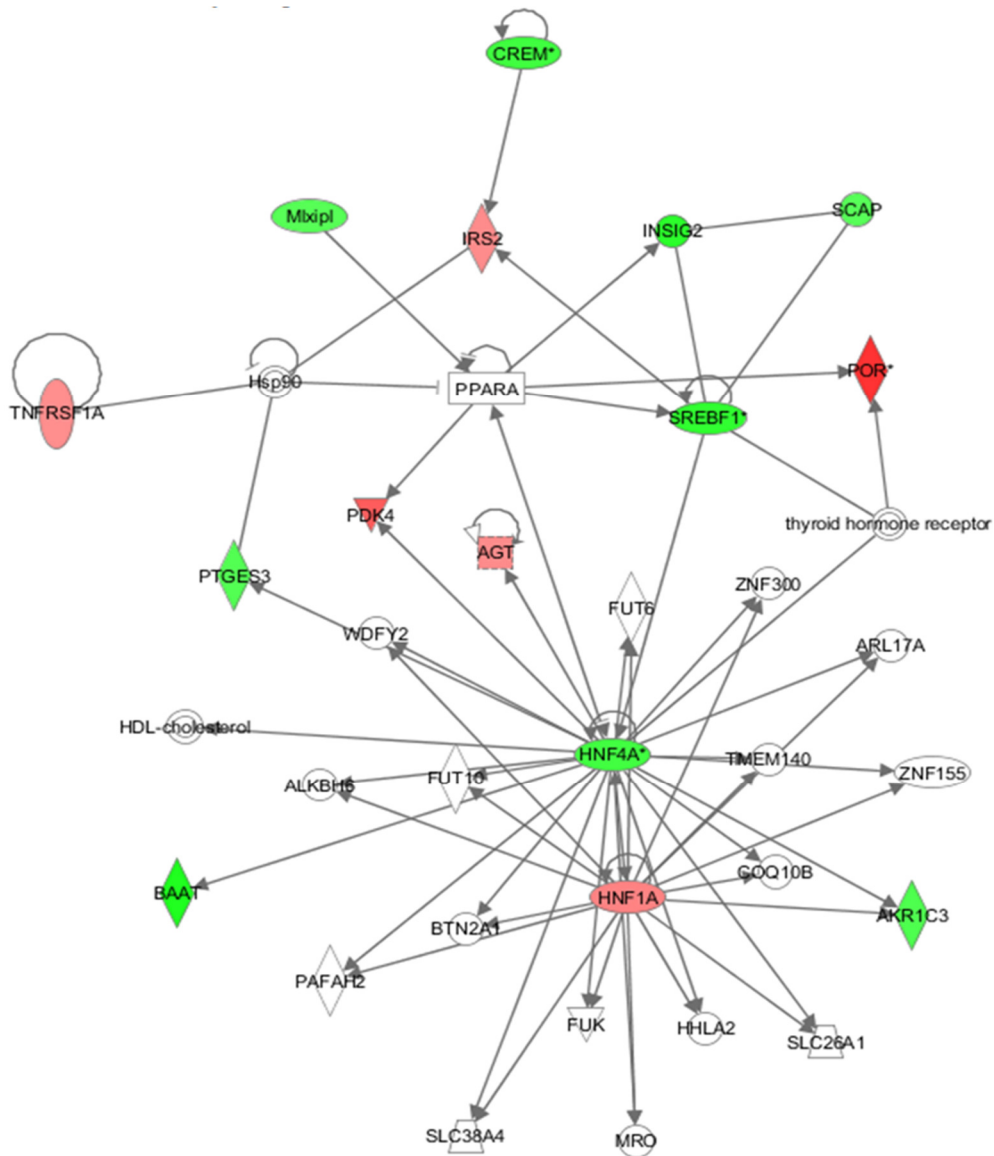

Three functional probeset lists based on queries of “steroid receptor”, “insulin receptor” or “fatty acid” were obtained from NetAffx. Each of these lists was compared to the list of differentially expressed genes (DEGs) for the one day zero hour time point to identify DEGs in each of the three functional categories. Each functional list was processed separately by Ingenuity Pathway Analysis (IPA) to produce a direct relationship graph. The graph constructed from the Ingenuity knowledgebase depicts some of the biological relationships among the probesets on the list. The shape of a gene-labeled object indicates its molecular function and its color indicates whether it is upregulated (red) or downregulated (green). The features of the connecting lines convey the nature of the molecular interaction. For a detailed legend of these IPA graphs see the [ingenuity.com](http://ingenuity.com) website.

**SI Table 1:** Effect of acute ozone exposure on the expression of probe sets belonging to different biological processes in the liver.

| Process                 | Number of probes on array | Number of DEGS from Master List | Per Cent Master List DEGs on Functional List |
|-------------------------|---------------------------|---------------------------------|----------------------------------------------|
| Amino acid biosynthesis | 4650                      | 507                             | 11                                           |
| Apoptosis               | 2345                      | 259                             | 11                                           |
| Diabetes                | 743                       | 117                             | 16                                           |
| Gluconeogenesis         | 80                        | 21                              | 26                                           |
| Glycolysis              | 114                       | 20                              | 18                                           |
| Mitochondria            | 671                       | 111                             | 17                                           |
| Steroid Metabolism      | 416                       | 77                              | 19                                           |
| Tricarboxylic           | 29                        | 10                              | 34                                           |
| Unfolded protein        | 154                       | 26                              | 17                                           |

Significantly different probes for specific biological processes were identified from a master differentially expressed genes list (DEGs) for air versus O<sub>3</sub> exposure which included genes for all three time points (Immediately after 1-day 6-hr, immediately after 2-day, 6-hr and 18 hours after 2-day, 6-hr).
